# Supplementary material
Source: MDPI journal article supplement (https://www.mdpi.com/1999-4907/13/6/848)
Supplement: s1 [file s1]

## Supplementary Table

**Supplementary Table S1: Details of selected Forest Type Group in Uttarakhand and Himachal Pradesh**

| Subgroup type (Himachal Pradesh)                                       | Area (km <sup>2</sup> ) | Subgroup type (Uttarakhand)                                           | Area (km <sup>2</sup> ) |
|------------------------------------------------------------------------|-------------------------|-----------------------------------------------------------------------|-------------------------|
| <b>12. Himalayan Moist Temperate Forests</b>                           |                         |                                                                       |                         |
| <i>C1. Lower Western Himalayan Temperate Forests</i>                   |                         |                                                                       |                         |
| <b>12/C1a. Ban oak forest</b> [BOF-III]                                | <b>811.26</b>           | <b>12/C1a. Ban oak forest (Two)</b> – [BOF-I; BOF-I]                  | <b>5009.21</b>          |
| 12/C1b. Moru oak forest                                                | 13.36                   | <b>12/C1b. Moru oak forest(Two)</b> – [MOF-I; MOF-II]                 | <b>978.92</b>           |
| <b>12/C1c. Moist deodar forest</b> [MDF-I]                             | <b>2269.11</b>          | <b>12/C1c. Moist deodar forest</b> [MDF-I]                            | <b>486.36</b>           |
| 12/C1d. Western mixed coniferous forest                                | 2079.34                 | <b>12/C1d. Western mixed coniferous forest</b> [WMCF]                 | <b>541.95</b>           |
| 12/C1e. Moist temperate deciduous forest                               | 277.67                  | <b>12/C1e. Moist temperate deciduous forest(Two)</b> [MTDF-I; MTDF-I] | <b>264.29</b>           |
| <b>12/C1f. Low-level blue pine forest</b> [LLBPF]                      | <b>497.81</b>           |                                                                       |                         |
| 12/C1/DS1. Oak scrub                                                   | 323.64                  | 12/C1/DS1. Oak scrub                                                  | 76.5                    |
| 12/C1/DS2. Himalayan temperate secondary scrub                         | 5.07                    | 12/C1/DS2. Himalayan temperate secondary scrub                        | 25.02                   |
| <i>C2. Upper West Himalayan Temperate Forests</i>                      |                         |                                                                       |                         |
| 12/C2a. Kharsu oak forest                                              | 26.07                   | <b>12/C2a. Kharsu oakforest</b> [KOF]                                 | <b>244.59</b>           |
| 12/C2b. West Himalayan Upper oak – fir forest                          | 12.54                   | <b>12/C2b. West Himalayan Upper oak – fir forest</b> [WHHLBPF]        | <b>1131.34</b>          |
|                                                                        |                         | 12/C2c. Moist temperate deciduous forest.                             | 317.71                  |
| 12/DS1. Montane bamboo brakes                                          | 15.63                   |                                                                       |                         |
| 12/1S1. Alder forest                                                   | 4.4                     | 12/1S1. Alder Forest                                                  | 10.16                   |
|                                                                        |                         | 12/2S1. Low-level blue pine forest                                    | 3.99                    |
| <b>13. Himalayan Dry Temperate Forest</b>                              |                         |                                                                       |                         |
| <i>Western Types</i>                                                   |                         |                                                                       |                         |
| <b>13/C1. Dry broadleaved and coniferous forest</b> [DBCF]             | <b>14.04</b>            |                                                                       |                         |
| <b>13/C2a. Neoza pine forests</b> [NPF]                                | <b>120.68</b>           |                                                                       |                         |
| 13/C2b. Dry deodar forest                                              | 225.43                  | <b>13/C2b. Dry deodar forest</b> [DDF]                                | 362.96                  |
| 13/C3. West Himalayan dry temperate deciduous forest                   | 6.56                    |                                                                       |                         |
| <b>13/C4. West Himalayan high level dry blue pine forest</b> [WHHLBPF] | <b>99.95</b>            |                                                                       |                         |
| 13/C5. West Himalayan dry juniper forest                               | 482.24                  |                                                                       |                         |
|                                                                        |                         | 13/1S1 <i>Hippophae/Myricaria scrub</i>                               | 85.8                    |
| 13/1S2 <i>Populus-Salix</i> forest                                     | 5.39                    |                                                                       |                         |
| <i>Eastern Types</i>                                                   |                         |                                                                       |                         |
| 13/1S3 (Western high-level dry blue pine forest).                      | 1.78                    |                                                                       |                         |

The text in parenthesis under Subgroup type is the number of sites. The text in bold under Subgroup reflects the selected type. The symbols for the studied forests are reported as [x].

**Supplementary Table S2: Site description of selected Forest Type Group in Uttarakhand and Himachal Pradesh**

| Forest subtype                                                                      | Symbol  | State               | Site                      | Latitude                             | Longitude                          | Elevation(m) | Slope (°)       | Aspect                    |
|-------------------------------------------------------------------------------------|---------|---------------------|---------------------------|--------------------------------------|------------------------------------|--------------|-----------------|---------------------------|
| 12/C1a Ban Oak Forest<br>( <i>Q.leuchotricophora</i> )                              | BOF-I   | Uttarakhand         | Binog,<br>Mussoorie       | 30°27'51.0006"-<br>30°28' 22.0008" N | 78°1'50.0016" -<br>78°2'2.0004" E  | 1611-1764    | 5.04°-42.99°    | N, E, S and W             |
| 12/C1a Ban Oak Forest                                                               | BOF-II  | Uttarakhand         | Pangot,<br>Nainital       | 29°24.575' N –<br>29°25.502' N       | 79°25.358' E-<br>79°25.512' E      | 2015-2033    | 20.76°-28.63°   | NE and NW                 |
| 12/C1a Ban Oak Forest<br>( <i>Q.leuchotricophora</i> )                              | BOF-III | Himachal<br>Pradesh | McLeodganj                | 32.2426° N -<br>32.2451° N           | 76.3214° E -<br>76.3228° E         | 1721-1777    | 11.74°-28.09°   | W, SW and S               |
| 13/C1 Dry Broadleaved and<br>Coniferous Forest ( <i>Q.ilex- P.<br/>gerardiana</i> ) | DBCF    | Himachal<br>Pradesh | Kalpa                     | 31.53025° N -<br>31.53118° N         | 78.26365° E -<br>78.26615° E       | 2410-2482    | 9.42°-29.21°    | SE and E                  |
| 13/C2 Dry Deodar Forest                                                             | DDF     | Uttarakhand         | Harshil,<br>Uttarkashi    | 31°1'57.0216"- 31°<br>2'20.4786" N   | 78°45'8.6178" -<br>78°45'2.5308" E | 2257- 2608   | 28.97°-37.97°   | N                         |
| 12/C2a Kharsu Oak Forest                                                            | KOF     | Uttarakhand         | Kunjikharak,<br>Nainital  | 29°30.293' N –<br>29°30.194' N       | 79°19.064' E-<br>79°19.232' E      | 2480-2547    | 1.64° - 32.24°  | NE, S, E, SW,<br>W and NW |
| 12/C1f Low-Level Blue Pine Forest<br>( <i>P.wallichiana</i> )                       | LLBPF   | Himachal<br>Pradesh | Manali                    | 32.2936° N -<br>32.2971° N           | 77.1829° E-<br>77.1840° E          | 2252-2311    | 20.87°-44.29°   | NW and W                  |
| 12/C1c Moist Deodar Forest                                                          | MDF-I   | Uttarakhand         | Jageshwar,<br>Almora      | 29.62675° N -<br>29.62661° N         | 79.83839° E -<br>79.84166° E       | 1897-1941    | 10.91°-18.07°   | NW, N, W and<br>E         |
| 12/C1c Moist Deodar forest<br>( <i>Cedrusdeodara</i> )                              | MDF-II  | Himachal<br>Pradesh | Dalhousie                 | 32.5258° N -<br>32.5270° N           | 76.0059° E-<br>76.011° E           | 2270-2380    | 10.1°-26.77°    | NW, W and SW              |
| 12/C1b Moru Oak Forest                                                              | MOF-I   | Uttarakhand         | Deoriatat,<br>Rudraprayag | 30°31'22.94"-<br>30°31'31.94" N      | 79°07'36.76"-<br>79°08'40.14" E    | 2388-2586    | 3.20°- 29.33°   | N, E, S and W             |
| 12/C1b Moru Oak Forest                                                              | MOF-II  | Uttarakhand         | Kilbury,<br>Nainital      | 29°24.905' N –<br>29°25.320' N       | 79°26.248' E-<br>79°26.181' E      | 2125-2290    | 10.12° - 31.00° | SW, NE, N and<br>SE       |
| 12/C1e Moist Temperate Deciduous<br>Forest                                          | MTDF-I  | Uttarakhand         | Sutol, Chamoli            | 30°15'58.4"-<br>30°16'06.1" N        | 79°37'02.3"-<br>79°37'03.4" E      | 2245-2309    | 9.97°- 43.07°   | N and NW                  |
| 12/C1e Moist Temperate Deciduous<br>Forest                                          | MTDF-II | Uttarakhand         | Dunagiri,<br>Almora       | 29.84067° N -<br>29.838969° N        | 79.44530° E -<br>79.445294° E      | 1905 - 2167  | 17.63° - 37.27° | NE and N and<br>NW        |
| 13/C2a Neoza Pine Forest<br>( <i>P.gerardiana</i> )                                 | NPF     | Himachal<br>Pradesh | Akpa                      | 31.5887° N -<br>31.5934° N           | 78.383° E-<br>78.4264° E           | 2496-2789    | 5.31°-25.8°     | SW, S and SE              |
| 13/C4 West Himalayan High Level<br>Blue Pine Forest                                 | WHHLBPF | Himachal<br>Pradesh | Narkanda                  | 31.2385° N -<br>31.2479° N           | 77.4339° E-<br>77.4476° E          | 2610-2714    | 13.07°-31.46°   | W, SW and SE              |
| 12/C2b West Himalayan Upper<br>Oak/fir Forest                                       | WHUO/FF | Uttarakhand         | Maid,Tehri                | 30°36'0.1686" - 30°<br>36'40.1112" N | 78°34'48.471"-<br>78°34'34.0602"E  | 2506 -2784   | 7.11°- 30.87°   | N and E                   |
| 12/C1d Western Mixed Coniferous<br>Forest                                           | WMCF    | Uttarakhand         | Deoban,<br>Chakrata       | 30°45.155'-<br>30°45.393' N          | 77°52.386'-<br>77°52.491' E        | 2586-2720    | 15.33°-42.46°   | N, NE and NW              |

**Supplementary Table S3: Spatio-temporal details of climatic parameters of study sites**

| State            | Site        | 2010                     |                          |                  | 2013                     |                          |                  | 2016                     |                          |                  | 2018                     |                          |                  |
|------------------|-------------|--------------------------|--------------------------|------------------|--------------------------|--------------------------|------------------|--------------------------|--------------------------|------------------|--------------------------|--------------------------|------------------|
|                  |             | T <sub>min</sub><br>(°C) | T <sub>max</sub><br>(°C) | Rainfall<br>(mm) |
| Uttarakhand      | Harshil     | 4.12                     | 13.27                    | 97.17            | 3.85                     | 12.6                     | 125.05           | 4.83                     | 13.62                    | 94.25            | 5.48                     | 12.93                    | 115.38           |
|                  | Maid, Tehri | 9.38                     | 18.3                     | 141.68           | 9.03                     | 17.52                    | 165.9            | 10.06                    | 18.63                    | 136.46           | 10.6                     | 17.88                    | 159.73           |
|                  | Mussoorie   | 12.82                    | 22.04                    | 173.71           | 12.51                    | 21.31                    | 187.31           | 13.48                    | 22.36                    | 168.1            | 14.11                    | 21.63                    | 189.94           |
|                  | Deoria Tal  | 7.52                     | 16.98                    | 133.34           | 7.13                     | 16.15                    | 172.37           | 8.15                     | 17.26                    | 134.38           | 8.66                     | 16.51                    | 162.76           |
|                  | Sutol       | 9.98                     | 20.43                    | 111.83           | 9.63                     | 19.63                    | 141.76           | 10.67                    | 20.76                    | 110.23           | 11.12                    | 19.95                    | 132.02           |
|                  | Chakrata    | 10.47                    | 19.07                    | 123.65           | 10.21                    | 18.37                    | 142.26           | 11.17                    | 19.42                    | 125.55           | 11.8                     | 18.73                    | 136.42           |
|                  | Pangot      | 11.95                    | 20.77                    | 138.7            | 11.38                    | 19.82                    | 176.26           | 12.44                    | 20.95                    | 146.84           | 12.91                    | 20.23                    | 159.04           |
|                  | Kilbury     | 11.95                    | 20.77                    | 138.7            | 11.38                    | 19.82                    | 176.26           | 12.44                    | 20.95                    | 146.84           | 12.91                    | 20.23                    | 159.04           |
|                  | Jageshwar   | 12.26                    | 21.7                     | 122.51           | 11.67                    | 20.7                     | 157.89           | 12.77                    | 21.85                    | 134.53           | 13.19                    | 21.05                    | 150.37           |
|                  | Dunagiri    | 12.91                    | 23.97                    | 120.75           | 12.49                    | 21.37                    | 155.84           | 13.51                    | 22.46                    | 127.46           | 13.98                    | 21.66                    | 144.12           |
|                  | Kunjkharak  | 12.1                     | 20.94                    | 142.07           | 11.6                     | 20.04                    | 179.72           | 12.63                    | 21.15                    | 148.43           | 13.12                    | 20.43                    | 162.62           |
| Himachal Pradesh | Manali      | 5.88                     | 14.91                    | 67.02            | 5.65                     | 14.54                    | 86               | 6.64                     | 15.34                    | 75.48            | 7.28                     | 14.76                    | 75.72            |
| Pradesh          | Narkanda    | 8.57                     | 16.81                    | 89.06            | 8.29                     | 16.14                    | 110.73           | 9.25                     | 17.17                    | 97.47            | 9.89                     | 16.53                    | 100.94           |
|                  | Akpa        | 6.16                     | 15.88                    | 56.93            | 5.96                     | 15.39                    | 78.97            | 6.92                     | 16.27                    | 59.29            | 7.61                     | 15.62                    | 73.33            |
|                  | Kalpa       | 7.67                     | 16.81                    | 62.78            | 7.46                     | 16.28                    | 85.18            | 8.44                     | 17.21                    | 66.47            | 9.12                     | 16.55                    | 77.89            |
|                  | Dalhousie   | 8.94                     | 18.06                    | 153.27           | 8.59                     | 17.62                    | 172.83           | 9.66                     | 18.51                    | 161.24           | 10.28                    | 18.08                    | 146.19           |
|                  | McLeodGanj  | 14.17                    | 23.01                    | 199.25           | 13.8                     | 22.49                    | 225.38           | 14.89                    | 23.45                    | 206.43           | 15.5                     | 22.91                    | 203.69           |

Source: WorldClim (<https://www.worldclim.org/data/monthlywth.html>)

**Supplementary Table S4: Forest cover of Uttarakhand and Himachal Pradesh (at 1000-3000 m amsl elevation)**

| State            | Forest                | 2015 (in Km <sup>2</sup> ) | 2019 (in Km <sup>2</sup> ) |
|------------------|-----------------------|----------------------------|----------------------------|
| Uttarakhand      | Very dense forest     | 3140                       | 3072                       |
|                  | Moderate dense forest | 8822                       | 8551                       |
|                  | Open forest           | 3675                       | 4022                       |
| Himachal Pradesh | Very dense forest     | 2429                       | 2554                       |
|                  | Moderate dense forest | 3429                       | 3616                       |
|                  | Open forest           | 2594                       | 2849                       |

Source: India State of Forest Report 2015; 2019

**Supplementary Table S5: Change in forest area under different temperate forest types of Uttarakhand and Himachal Pradesh**

| State            | Forest                                      | 2015(%) | 2019 (%) |
|------------------|---------------------------------------------|---------|----------|
| Uttarakhand      | Dry Deodar Forest                           | 1.46    | 0.73     |
|                  | West Himalayan upper Oak/fir Forest         | 4.57    | 5.49     |
|                  | Ban Oak Forest ( <i>Q.leucotricophora</i> ) | 20.23   | 13.86    |
|                  | Moru Oak Forest                             | 3.95    | 0.47     |
|                  | Moist Temperate Deciduous Forest type       | 1.28    | 0.79     |
|                  | Western Mixed Coniferous Forest             | 2.19    | 5.01     |
| Himachal Pradesh | Moist Deodar Forest                         | 1.96    | 1.55     |

|                                                                       |       |       |
|-----------------------------------------------------------------------|-------|-------|
| Kharsu Oak Forest                                                     | 0.99  | 3.08  |
| Low-Level Blue Pine Forest ( <i>P.wallichiana</i> )                   | 3.38  | 2.79  |
| West Himalayan High Level Blue Pine                                   | 0.68  | 0.65  |
| Neoza Pine Forest ( <i>P.gerardiana</i> )                             | 0.82  | 0.63  |
| Dry Broadleaved and Coniferous Forest ( <i>Q.ilex- P.gerardiana</i> ) | 0.09  | 0.04  |
| Moist deodar Forest (Cedrus)                                          | 15.38 | 11.40 |
| Ban Oak Forest ( <i>Q.leucotricophora</i> )                           | 5.5   | 4.43  |

Source: India State of Forest Report 2015; 2019
